# Supplementary material
Source: PubMed Central journal article supplement (PMC4048180)
Supplement: NIHMS55175-supplement-01.pdf [file NIHMS55175-supplement-01.pdf]

## Supplementary Figure 1

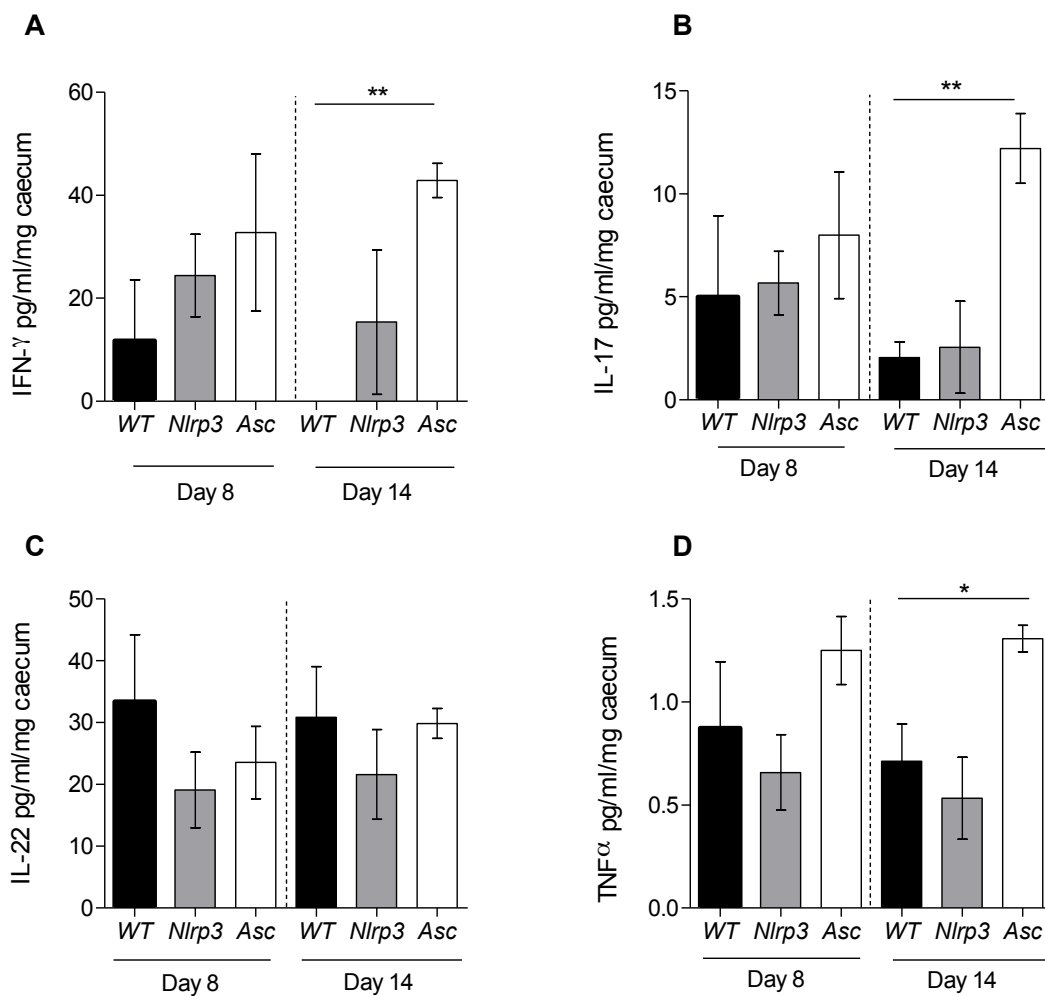

**Figure S1. Induction of inflammatory cytokines upon infection with *C. rodentium*.** Mice were orally infected with  $\sim 10^9$  cfu of *C. rodentium* and sacrificed 8 or 14 days post-infection. Caeca were isolated and explants were cultured overnight before harvesting supernatants and analyzing for (A) IFN $\gamma$  (B) IL-17 (C) IL-22 and (D) TNF $\alpha$ . Data represent means  $\pm$ SEM. ( $n = 4$  mice per time point). Statistical analysis was performed using the Mann-Whitney test (\* =  $p < 0.05$ ). Data are representative of two independent experiments.

## Supplementary Figure 2

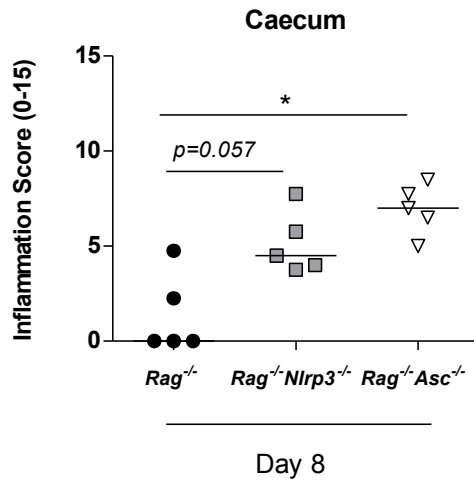

**Figure S2. Nlrp3 and Asc confer protection against *C. rodentium* induced intestinal inflammation independently of the adaptive immune system.** Mice were infected by oral gavage with  $\sim 10^9$  cfu of *C. rodentium* and sacrificed 8 days post-infection. Inflammation scores in the caecum were assessed by scoring H & E stained histology sections and are graphically represented above. Results are from a single experiment. Horizontal bars represent the median inflammation scores. Statistical significance was determined by the Mann-Whitney test. (\* =  $P < 0.05$ ).

## Supplementary Figure 3

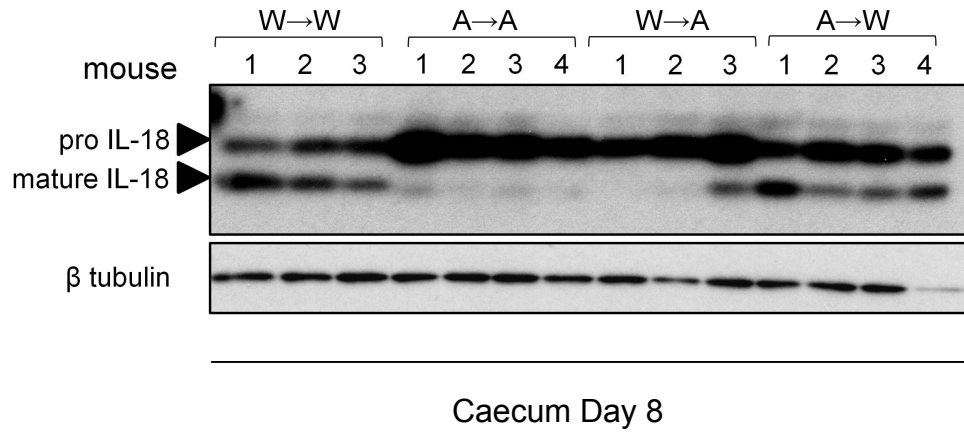

**Figure S3. Non-haematopoietic cell *Asc* expression is required for IL-18 production in the intestine after *C. rodentium* infection.** Irradiation bone marrow chimeras were generated as described in materials and methods, infected with  $\sim 10^9$  *C. rodentium* and sacrificed 8 days later. The caeca of infected mice were then isolated and homogenized to isolate protein. Subsequently we carried out immunoblot analysis of total caecal protein extracts from WT, *Nlrp3*<sup>-/-</sup> and *Asc*<sup>-/-</sup> chimeras 8 days p.i., and probed with antibody against IL-18 and tubulin ( $n = 3-4$  mice). Results shown are from a single experiment.

## Supplementary Figure 4

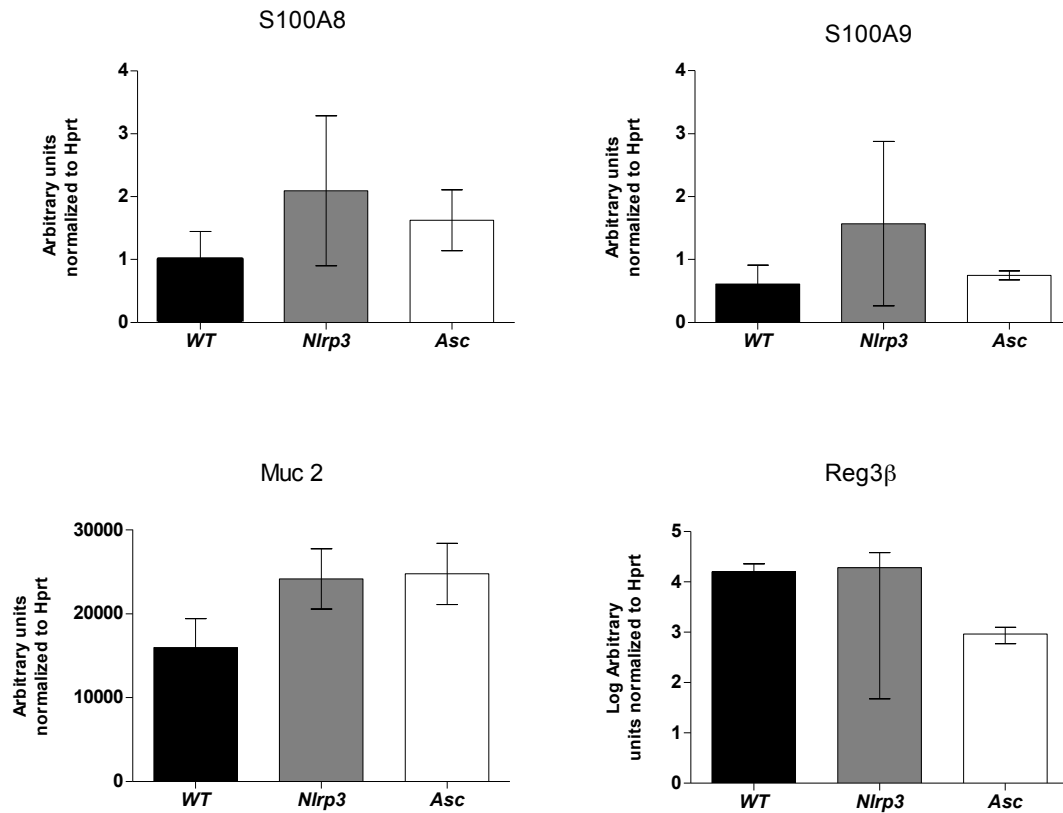

**Figure S4. Comparable antimicrobial peptide (AMP) expression in inflammasome deficient mice.** Expression of a variety of antimicrobial peptides and mucin were measured in the caeca of WT, *Nlrp3*<sup>-/-</sup> and *Asc*<sup>-/-</sup> mice at steady state by qPCR. Data are represented as mean  $\pm$ SEM.  $n = 4-8$  mice and are pooled from one to two independent experiments.

## Supplementary Figure 5

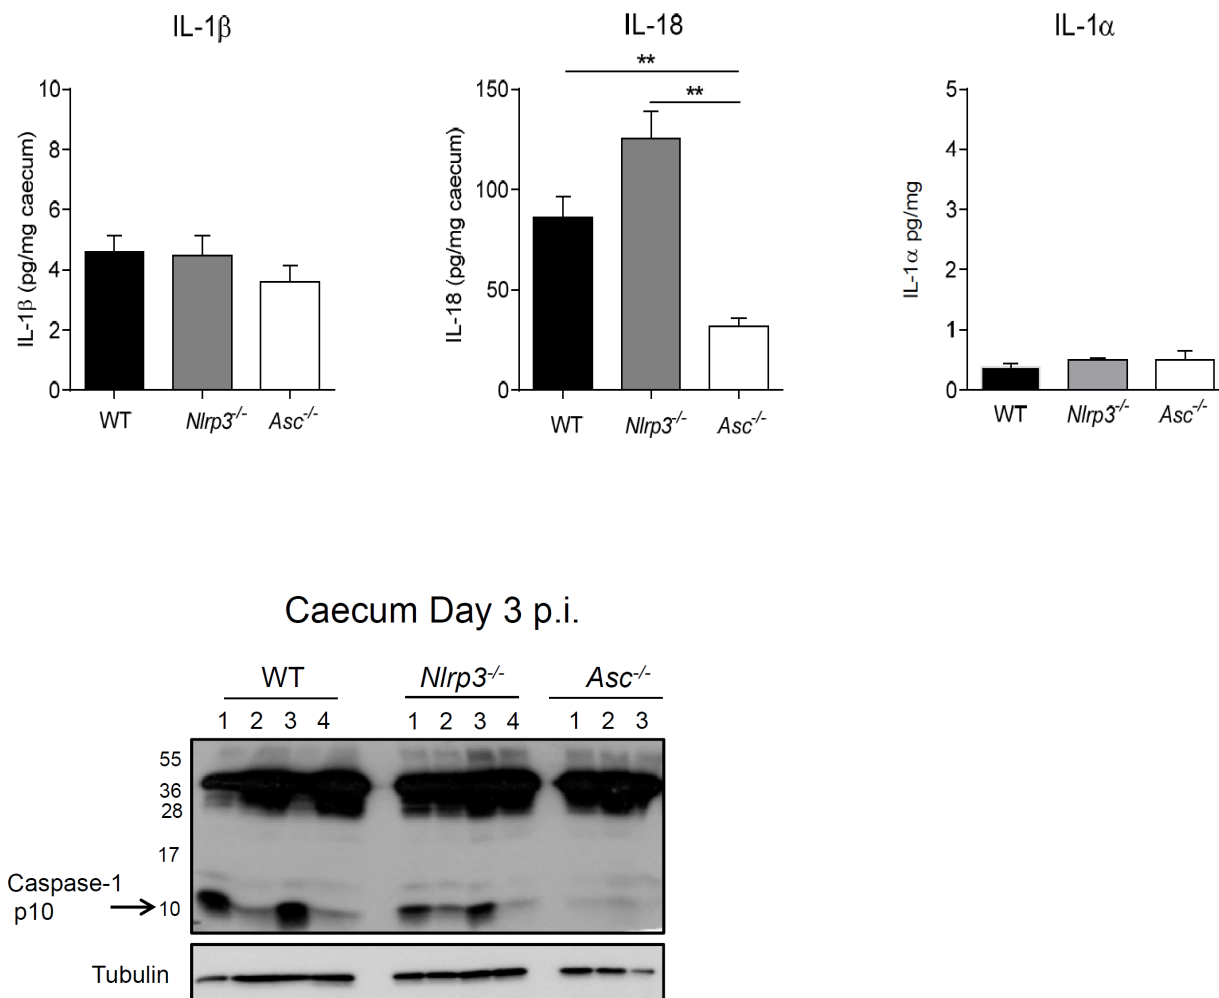

**Figure S5. Early protection against *C. rodentium* is independent of caspase-1 cleaved cytokines.** WT, *Nlrp3*<sup>-/-</sup> and *Asc*<sup>-/-</sup> mice were infected by oral gavage with  $\sim 10^9$  cfu of *C. rodentium* and sacrificed 72h post infection. Caecal explants were cultured overnight before harvesting supernatant and analyzing for IL-1 $\beta$ , IL-1 $\alpha$  and IL-18 levels by ELISA. Additionally, immunoblot analysis of caecal protein extracts from WT, *Nlrp3*<sup>-/-</sup> and *Asc*<sup>-/-</sup> mice was performed with antibodies to caspase-1 p10 and tubulin. Data are represented as means  $\pm$  SEM.  $n = 3-4$  mice from a single experiment representative of at least two independent experiments.

## Supplementary Figure 6

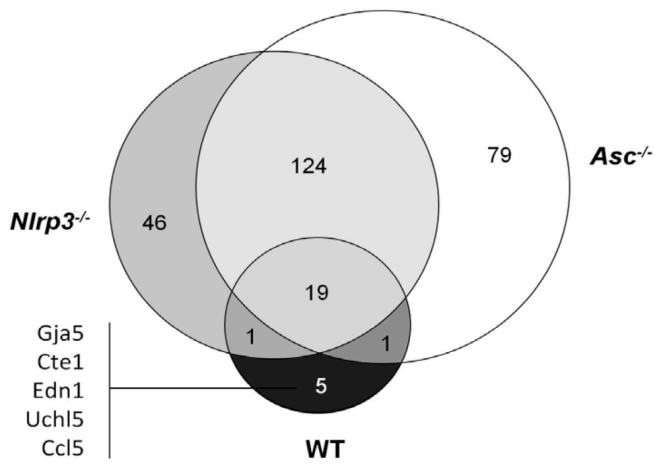

**Figure S6. Genes induced upon infection in *Nlrp3*<sup>-/-</sup>, *Asc*<sup>-/-</sup>, and WT.** WT, *Nlrp3*<sup>-/-</sup>, and *Asc*<sup>-/-</sup> mice were infected with  $\sim 10^9$  *C. rodentium* and sacrificed 72h p.i. ( $n = 3$ ). RNA was isolated from caeca and gene expression profiled using Illumina Mouse WG6v2 Expression BeadChip. Venn diagram of the genes induced upon infection (at least 1.5-fold 72h p.i. vs uninfected).

## Supplementary Figure 7

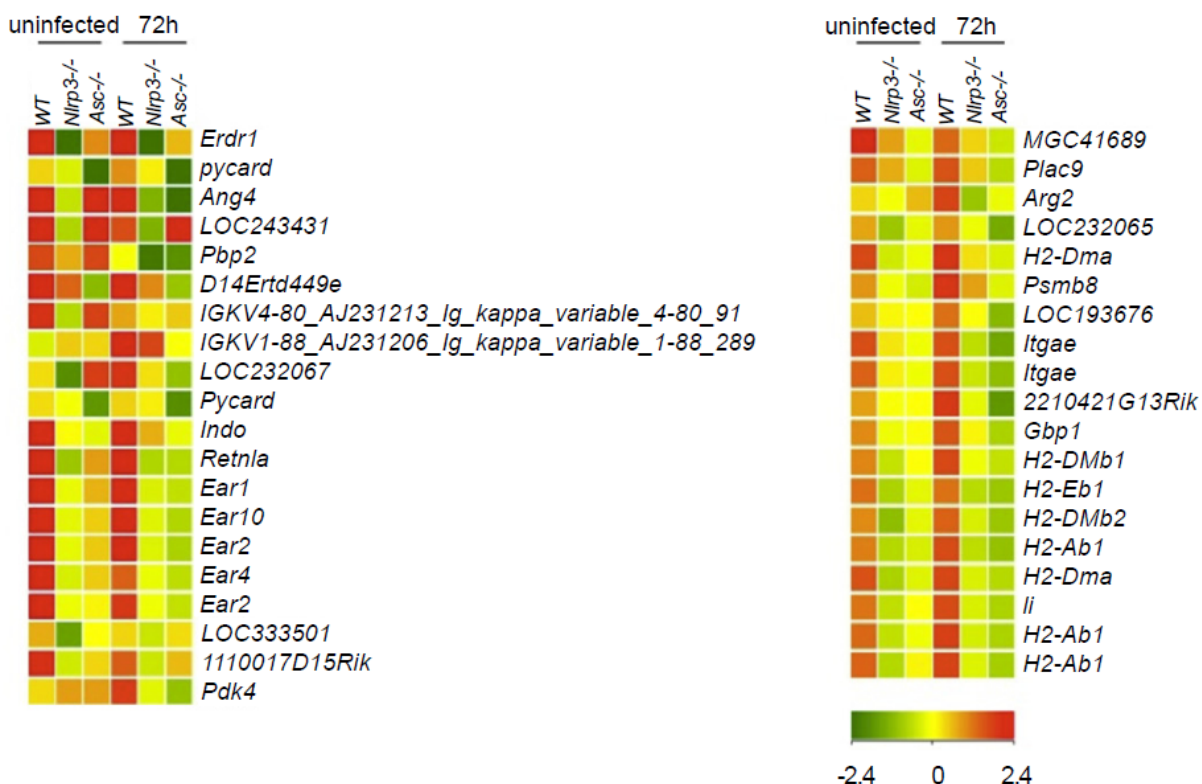

**Figure S7. Differentially expressed genes between WT, *Nlrp3*<sup>-/-</sup> and *Asc*<sup>-/-</sup> mice.** Cohorts of WT, *Nlrp3*<sup>-/-</sup>, and *Asc*<sup>-/-</sup> mice were either left uninfected or orally infected with  $\sim 10^9$  *C. rodentium* and sacrificed at 3 days p.i. ( $n = 3$  per group). Thereafter caecal tissue RNA was isolated and subjected to genome wide transcriptional profiling.

Depicted above is a heat map representing 33 unique genes significantly expressed at a lower level (at least 2-fold) in either *Nlrp3*<sup>-/-</sup> or *Asc*<sup>-/-</sup> relative to WT mice, during steady state (uninfected) and/or 3 days p.i.. Colour range (green to red) represent log transformed normalized intensity values.
